# Supplementary material for: Rationally re-designed mutation of NAD-independent l-lactate dehydrogenase: high optical resolution of racemic mandelic acid by the engineered Escherichia coli
Source: PubMed Central journal article supplement (PMC3526519; doi:10.1186/1475-2859-11-151), 2012-11-23
Supplement: 1475-2859-11-151-S2.pdf [file 1475-2859-11-151-S2.pdf]

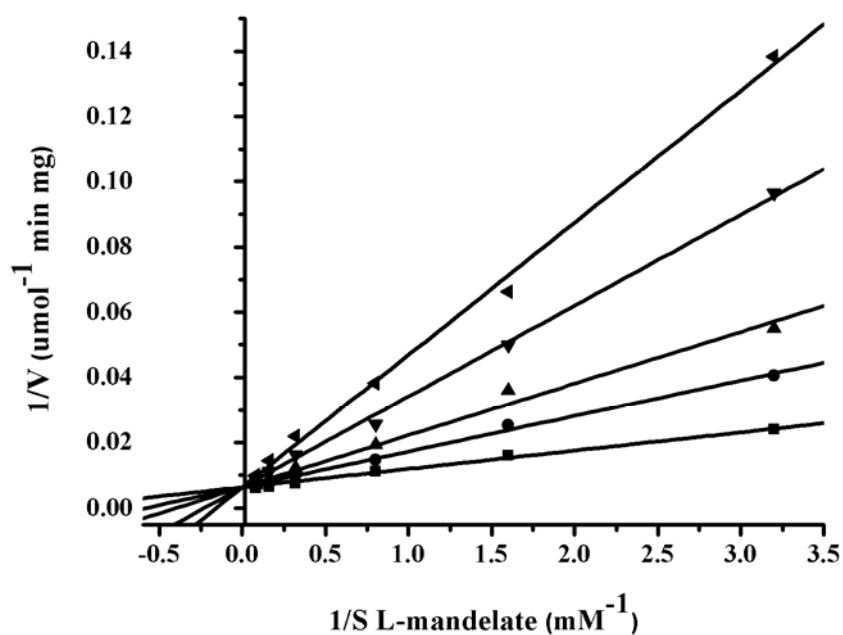

**Additional Figure 2. Inhibition of V108A L-iLDH by D-mandelate.** Purified V108A L-iLDH (1  $\mu\text{g}$ ) was incubated in the reaction mixture contained 0.0625 mM DCIP and 50 mM Tris-HCl (pH 7.5) at 30°C. The reaction was started with different L-mandelate concentrations at variable D-mandelate concentrations. ■, no D-mandelate; ●, 6.25 mM D-mandelate; ▲, 12.5 mM D-mandelate; ▼, 25 mM D-mandelate; ◄, 37.5 mM D-mandelate. The patterns of double-reciprocal plots indicate a competitive inhibition. The  $K_i$  value was estimated to be  $5.5 \pm 0.5$  mM.
