# Supplementary material for: Rationally re-designed mutation of NAD-independent l-lactate dehydrogenase: high optical resolution of racemic mandelic acid by the engineered Escherichia coli
Source: PubMed Central journal article supplement (PMC3526519; doi:10.1186/1475-2859-11-151), 2012-11-23
Supplement: 1475-2859-11-151-S4.pdf [file 1475-2859-11-151-S4.pdf]

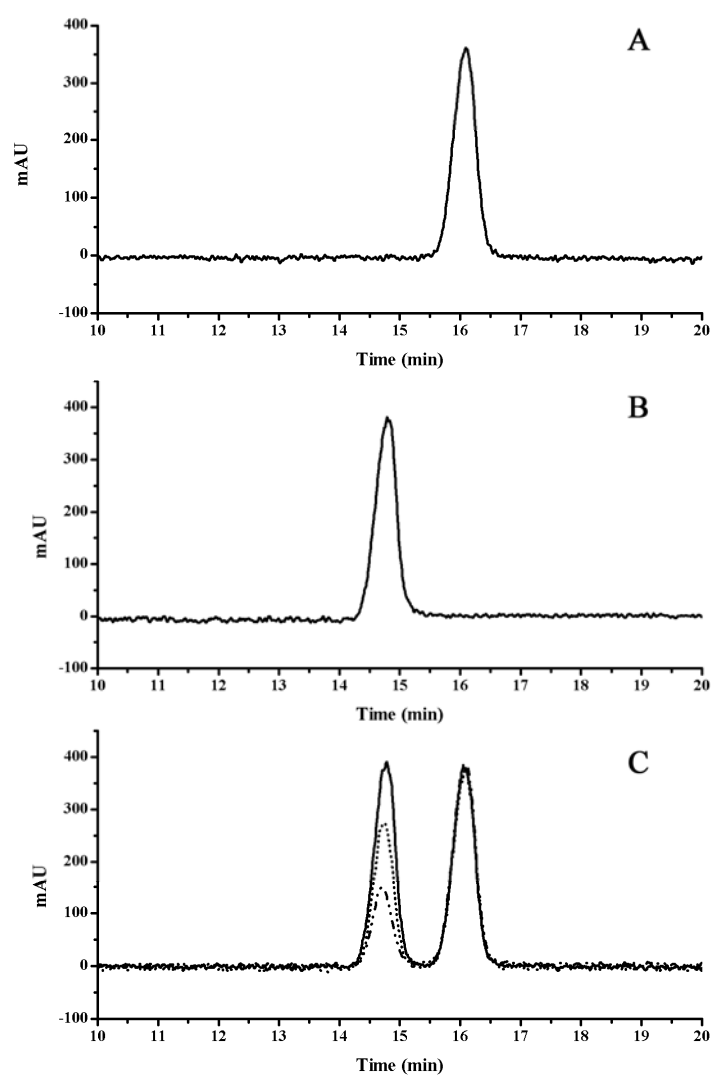

**Additional Figure 4. HPLC analysis of the chiral products of the reaction catalyzed by V108A L-iLDH.** (A) Authentic D-mandelic acid; (B) authentic L-mandelic acid; (C) reaction mixture at the beginning of the reaction (solid line), after 4 h (short dot line), and after 10 h (dash dot line). The biotransformation was carried out using 12.5 g (DCW) L<sup>-1</sup> of *E. coli* expressing V108A L-iLDH as the biocatalyst and 10 g·L<sup>-1</sup> DL-mandelic acid as the substrate. The analytical methods are described in the “Materials and methods”.
