# Supplementary material for: Rationally re-designed mutation of NAD-independent l-lactate dehydrogenase: high optical resolution of racemic mandelic acid by the engineered Escherichia coli
Source: PubMed Central journal article supplement (PMC3526519; doi:10.1186/1475-2859-11-151), 2012-11-23
Supplement: 1475-2859-11-151-S5.pdf [file 1475-2859-11-151-S5.pdf]

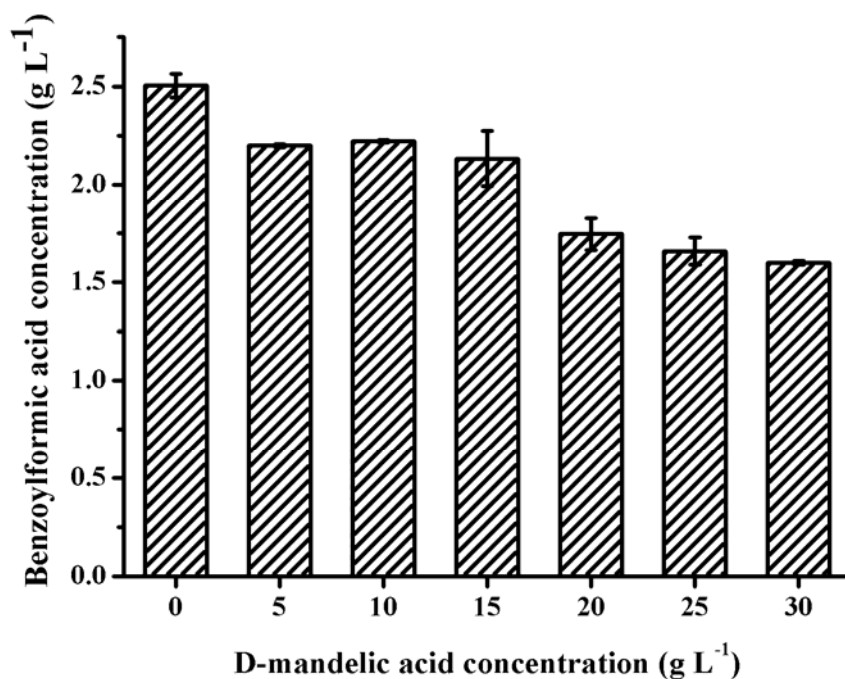

**Additional Figure 5. The inhibition effect of D-mandelic acid on the whole-cell biocatalyst activity.** Different concentrations of D-mandelic acid (from 0 g·L<sup>-1</sup> to 30 g·L<sup>-1</sup>) were added to reaction systems containing 10 g·L<sup>-1</sup> L-mandelic acid. The activity of whole-cell biocatalyst was judged by the concentration of benzoylformic acid produced within 4 h of reaction. Values are the mean  $\pm$  SD of 3 separate determinations.
