# Supplementary material for: Rationally re-designed mutation of NAD-independent l-lactate dehydrogenase: high optical resolution of racemic mandelic acid by the engineered Escherichia coli
Source: PubMed Central journal article supplement (PMC3526519; doi:10.1186/1475-2859-11-151), 2012-11-23
Supplement: 1475-2859-11-151-S6.pdf [file 1475-2859-11-151-S6.pdf]

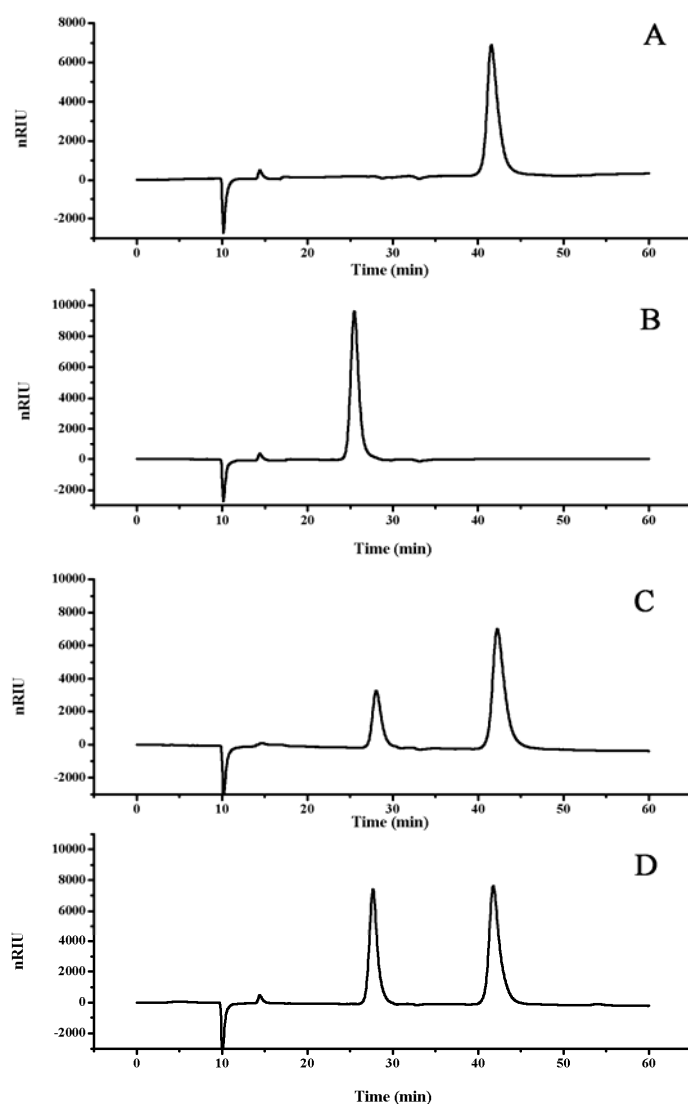

**Additional Figure 6. HPLC analysis of the products from the reaction catalyzed by V108A L-iLDH.** (A) Authentic mandelic acid; (B) authentic benzoylformic acid; (C) reaction mixture after 8 h of reaction without adding EDTA; (D) reaction mixture after 8 h of reaction with 20 mM EDTA added. The biotransformation was carried out using 25 g (DCW)  $L^{-1}$  of *E. coli* expressing V108A L-iLDH as the biocatalyst and 10  $g \cdot L^{-1}$  DL-mandelic acid as the substrate. The analytical methods are described in the “Materials and methods.”
